# Supplementary material
Source: PubMed Central journal article supplement (PMC7859698)

**B**

normal

**Ferritin**

A-CA

Tian J et al<sup>120</sup> (40)Ahluwalia M et al<sup>28</sup> (3)Akalin E et al<sup>30</sup> (28)Alberici F et al<sup>31</sup> (20)Becchetti C et al<sup>35</sup> (13)Bossini N et al<sup>39</sup> (45)Chaudhry ZS et al<sup>42</sup> (35)Chen TY et al<sup>44</sup> (30)CUKTP<sup>45</sup> (12)Cravedi P et al<sup>46</sup> (144)Crespo M et al<sup>47</sup> (16)Ketcham SW et al<sup>57</sup> (13)Latif F et al<sup>60</sup> (17)Lima B et al<sup>63</sup> (4)Mella A et al<sup>67</sup> (5)Morillas JA et al<sup>70</sup> (5)Nair V et al<sup>73</sup> (10)Pereira MR et al<sup>76</sup> (90)Perez-Saez M et al<sup>77</sup> (80)

Study (n of patients)

0

2000

4000

6000

8000

10000

pg/mL

SOT

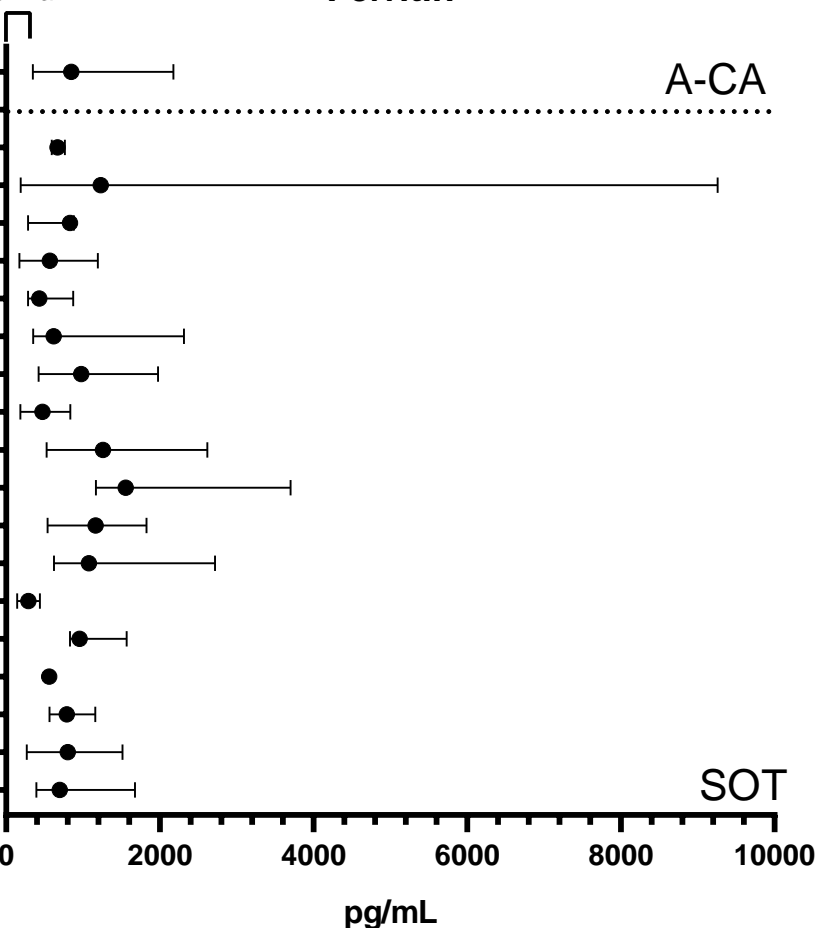

Supplement: mmc2.pdf [file mmc2.pdf]
