# Supplementary material
Source: PubMed Central journal article supplement (PMC7859698)
Supplement: mmc8.pdf [file mmc8.pdf]

| <b>Author (ref)<br/>Country</b>                 | <b>N</b> | <b>Median<br/>Age</b> | <b>Study<br/>Population</b> | <b>Study Design</b>        | <b>Clinical Severity<br/>(n)</b> | <b>COVID-19<br/>Therapy (n)</b>                                                           | <b>Outcomes<br/>(n died/<br/>n recovered)</b> |
|-------------------------------------------------|----------|-----------------------|-----------------------------|----------------------------|----------------------------------|-------------------------------------------------------------------------------------------|-----------------------------------------------|
| <b>SOT</b>                                      |          |                       |                             |                            |                                  |                                                                                           |                                               |
| Abrishami et al<br>(27)<br>Iran                 | 12       | 47.5                  | 100% kidney                 | Case series                | Hospitalized (12)<br>ICU (10)    | Antiviral (12)<br>HCQ (12)<br>Corticosteroids<br>(12)<br>IVIG (12)                        | 8/4                                           |
| Ahluwalia et al<br>(28)<br>United States        | 5        | 50                    | 100% heart                  | Case series                | Hospitalized (4)<br>ICU (0)      | Antiviral (2)                                                                             | 1/4                                           |
| Ahmad et al<br>(29)<br>United<br>Kingdom        | 1        | 53                    | 100% kidney                 | Case report                | Hospitalized (1)<br>ICU (1)      | Corticosteroids (1)                                                                       | 0/1                                           |
| Akalin et al (30)<br>United States              | 36       | 60                    | 100% kidney                 | Case series                | Hospitalized (28)<br>ICU (11)    | HCQ (24)<br>Azithromycin (13)<br>Corticosteroids (2)<br>Leronlimab (6)<br>Tocilizumab (2) | 10/3                                          |
| Alberici et al<br>(31)<br>Italy                 | 20       | 59                    | 100% kidney                 | Observational<br>cohort    | Hospitalized (20)<br>ICU (4)     | Antiviral (19)<br>HCQ (19)<br>Corticosteroids<br>(20)<br>Tocilizumab (6)                  | 4/16                                          |
| Arpali et al (32)<br>Turkey                     | 1        | 28                    | 100% kidney                 | Case report                | Hospitalized (1)<br>ICU (0)      | Antiviral (1)                                                                             | 0/1                                           |
| Banerjee et al<br>(33)<br>United<br>Kingdom     | 7        | 54                    | 100% kidney                 | Retrospective<br>cohort    | Hospitalized (5)<br>ICU (2)      | Antiviral (1)<br>Corticosteroids (1)                                                      | 1/6                                           |
| Bartirolo et al<br>(34)<br>Italy                | 1        | 36                    | 100% kidney                 | Short<br>communicatio<br>n | Hospitalized (1)<br>ICU (0)      | Antiviral (1)<br>HCQ (1)                                                                  | 0/1                                           |
| Becchetti et al<br>(35)<br>Multiple<br>European | 57       | 65                    | 100% liver                  | Retrospective<br>cohort    | Hospitalized (37)<br>ICU (4)     | Antiviral (3)<br>HCQ (24)<br>Azithromycin (15)<br>Corticosteroids<br>(19)                 | 9/48                                          |

|                                          |     |      |                                                             |                         |                                   |                                                                                               |       |
|------------------------------------------|-----|------|-------------------------------------------------------------|-------------------------|-----------------------------------|-----------------------------------------------------------------------------------------------|-------|
| Belli et al (36)<br>Multiple<br>European | 103 | 65   | 100% liver                                                  | Case series             | Hospitalized (83)<br>ICU (15)     | Antiviral (18)<br>HCQ (68)<br>Azithromycin (34)<br>Corticosteroids<br>(19)<br>Tocilizumab (7) | 16/87 |
| Bhoori et al (37)<br>Italy               | 3   | NA   | 100% liver                                                  | case series             | Hospitalized (3)<br>ICU (3)       | NI                                                                                            | 3/0   |
| Bösch et al (38)<br>Germany              | 7   | 61.4 | 28.6% liver,<br>42.9% kidney,<br>14.2% heart,<br>14.2% lung | Case series             | Hospitalized (7)<br>ICU (4)       | None                                                                                          | 0/7   |
| Bossini et al<br>(39)<br>Italy           | 53  | 60   | 100% kidney                                                 | Retrospective<br>cohort | Hospitalized (45)<br>ICU (10)     | Antiviral (32)<br>HCQ (39)<br>Azithromycin (8)<br>Corticosteroids<br>(45)                     | 15/38 |
| Bush et al (40)<br>United States         | 1   | 13   | 100% kidney                                                 | Case report             | Hospitalized (1)<br>ICU (0)       | None                                                                                          | 0/1   |
| Bussalino et al<br>(41)<br>Italy         | 1   | 32   | 100% kidney                                                 | Case report             | Hospitalized (1)<br>ICU (0)       | Antiviral (1)<br>HCQ (1)<br>Corticosteroids (1)                                               | 0/1   |
| Chaudhry et al<br>(42)<br>United States  | 47  | 61   | 4.2% liver,<br>80.9% kidney,<br>10.6% heart,<br>8.5% lung*  | case control            | Hospitalized (35)<br>ICU (13)     | HCQ (32)<br>Corticosteroids<br>(23)<br>Tocilizumab (3)                                        | 8/39  |
| Chen D et al<br>(43)<br>China            | 1   | 29   | 100% kidney                                                 | Case report             | Hospitalized (1)<br>ICU (0)       | Antiviral (1)<br>IFN-a (1)                                                                    | NA    |
| Chen TY et al<br>(44)<br>United States   | 30  | 56   | 100% kidney                                                 | Retrospective<br>cohort | Hospitalized (30)<br>ICU (NI)     | HCQ (3)<br>Azithromycin (30)<br>Corticosteroids<br>(18)                                       | 6/24  |
| CUKTP (45)<br>United States              | 15  | 51   | 87% kidney,<br>13% multiple                                 | Case series             | Hospitalized (15)<br>ICU (5)      | HCQ (13)<br>Azithromycin (9)<br>Corticosteroid (1)<br>Tocilizumab (1)                         | 2/13  |
| Cravedi et al<br>(46)<br>United States   | 144 | 62   | 100% kidney                                                 | Retrospective<br>cohort | Hospitalized<br>(144)<br>ICU (43) | Antiviral (20)<br>HCQ (101)                                                                   | 46/98 |

|                                    |    |      |                                                                          |                      |                               |                                                                                                       |      |
|------------------------------------|----|------|--------------------------------------------------------------------------|----------------------|-------------------------------|-------------------------------------------------------------------------------------------------------|------|
|                                    |    |      |                                                                          |                      |                               | Corticosteroids (95)<br>Tocilizumab (19)                                                              |      |
| Crespo et al (47)<br>Spain         | 16 | 73.6 | 100% kidney                                                              | Case series          | Hospitalized (15)<br>ICU (6)  | Antiviral (5)<br>HCQ (13)<br>Corticosteroids (6)<br>Tocilizumab (4)                                   | 8/8  |
| Fernández-Ruiz et al (48)<br>Spain | 18 | 71   | 33% liver,<br>44% kidney,<br>22% heart                                   | Case series          | Hospitalized (17)<br>ICU (0)  | Antiviral (9)<br>HCQ (5)<br>IVIg (2)<br>Tocilizumab (2)                                               | 5/13 |
| Fung et al (49)<br>United States   | 10 | 56.5 | 10% liver,<br>70% kidney,<br>10% heart,<br>10% lung                      | Case series          | Hospitalized (7)<br>ICU (3)   | Antiviral (3)<br>HCQ (3)<br>Azithromycin (1)<br>Corticosteroid (1)<br>C Plasma (1)<br>Tocilizumab (1) | 0/10 |
| Guillen et al (50)<br>Spain        | 1  | 50   | 100% kidney                                                              | Case report          | Hospitalized (1)<br>ICU (1)   | Antiviral (1)<br>HCQ (1)<br>Azithromycin (1)<br>IFN-b (1)                                             | 0/1  |
| Hoek et al (51)<br>Netherlands     | 23 | 59   | 4.3% liver,<br>65.2% kidney,<br>13% heart,<br>13% lung,<br>4.3% multiple | Case series          | Hospitalized (19)<br>ICU (2)  | HCQ (3)<br>Azithromycin (11)                                                                          | 5/18 |
| Huang JF et al (52)<br>China       | 1  | 59   | 100% liver                                                               | Case report          | Hospitalized (1)<br>ICU (1)   | Antiviral (1)<br>Corticosteroids (1)<br>IVIg (1)<br>IFN $\alpha$ (1)                                  | 1/0  |
| Husain et al (53)<br>United States | 41 | 49   | 100% kidney                                                              | Retrospective cohort | Hospitalized (13)<br>ICU (NI) | NI                                                                                                    | NI   |
| Jiang et al (54)<br>China          | 1  | 70   | 100% kidney                                                              | Case report          | Hospitalized (1)<br>ICU (1)   | Convalescent plasma (1)                                                                               | 0/1  |
| Kates et al (55)<br>United States  | 4  | 60.5 | 25% liver,<br>25% kidney,<br>25% heart,<br>25% lung                      | Case series          | Hospitalized (2)<br>ICU (0)   | Corticosteroids (1)                                                                                   | 0/4  |
| Keller et al (56)                  | 1  | 68   | 100% lung                                                                | Case report          | Hospitalized (1)              | HCQ (1)                                                                                               | 0/1  |

|                                     |    |      |                            |                      |                               |                                                                                    |      |
|-------------------------------------|----|------|----------------------------|----------------------|-------------------------------|------------------------------------------------------------------------------------|------|
| United States                       |    |      |                            |                      | ICU (1)                       | Azithromycin (1)                                                                   |      |
| Ketcham et al (57)<br>United States | 13 | 61 * | 77% heart,<br>23% multiple | Case series          | Hospitalized (13)<br>ICU (6)  | HCQ (8)<br>Corticosteroids (8)<br>Tocilizumab (3)                                  | 2/11 |
| Kolonko et al (58)<br>Poland        | 4  | 47   | 25% liver,<br>75% kidney   | Case series          | Hospitalized (4)<br>ICU (NI)  | NI                                                                                 | 1/3  |
| Lagana et al (59)<br>United States  | 1  | 0.5  | 100% liver                 | Case report          | Hospitalized (1)<br>ICU (0)   | HCQ (1)                                                                            | 0/1  |
| Latif et al (60)<br>United States   | 28 | 64   | 100% heart                 | Case series          | Hospitalized (22)<br>ICU (7)  | HCQ (18)<br>Corticosteroid (8)<br>Tocilizumab (6)                                  | 2/26 |
| Lee BT et al (61)<br>United States  | 38 | 66   | 84% liver,<br>16% multiple | Case series          | Hospitalized (27)<br>ICU (8)  | HCQ (18)<br>Azithromycin (18)<br>Corticosteroids (5)                               | 7/31 |
| Lee H et al (62)<br>United States   | 4  | 8.71 | 50% heart,<br>50% multiple | Case series          | Hospitalized (2)<br>ICU (0)   | None                                                                               | 0/4  |
| Lima et al (63)<br>United States    | 5  | 67   | 100% heart                 | Retrospective cohort | Hospitalized (5)<br>ICU (2)   | Antiviral (1)<br>HCQ (3)<br>Corticosteroids (1)<br>C Plasma (1)<br>Tocilizumab (1) | 0/5  |
| Liu et al (64)<br>China             | 1  | 50   | 100% liver                 | Case report          | Hospitalized (1)<br>ICU (NI)  | Antiviral (1)<br>Corticosteroids (1)<br>IVIg (1)<br>IFN $\alpha$ (1)               | 0/1  |
| Marx et al (65)<br>France           | 1  | 58   | 100% kidney                | Letter to the editor | Hospitalized (1)<br>ICU (0)   | None                                                                               | 0/1  |
| Mattioli et al (66)<br>Italy        | 1  | 62   | 100% heart                 | Case report          | Hospitalized (1)<br>ICU (0)   | HCQ (1)<br>Corticosteroids (1)<br>Tocilizumab (1)                                  | 0/1  |
| Mella et al (67)<br>Italy           | 6  | 58   | 100% kidney                | Case series          | Hospitalized (6)<br>ICU (6)   | Antiviral (1)<br>HCQ (6)<br>Corticosteroids (3)<br>IVIg (1)<br>Tocilizumab (6)     | 4/2  |
| Montagud-Marrahi et al (68)         | 33 | 57.3 | 94% kidney,<br>6% multiple | Case series          | Hospitalized (26)<br>ICU (13) | Antiviral (21)<br>HCQ (22)<br>Azithromycin (24)                                    | 2/31 |

|                                      |    |     |                                                                        |                      |                               |                                                                                                                  |       |
|--------------------------------------|----|-----|------------------------------------------------------------------------|----------------------|-------------------------------|------------------------------------------------------------------------------------------------------------------|-------|
| Spain                                |    |     |                                                                        |                      |                               | Corticosteroids (13)<br>Cytokine blockade (18)                                                                   |       |
| Morand et al (69)<br>France          | 1  | 4.6 | 100% liver                                                             | Case report          | Hospitalized (1)<br>ICU (0)   | None                                                                                                             | 0/1   |
| Morillas et al (70)<br>United States | 5  | 57  | 20% liver,<br>40% kidney,<br>20% lung,<br>20% face                     | Case series          | Hospitalized (5)<br>ICU (5)   | Antiviral (1)<br>HCQ (3)<br>Azithromycin (3)<br>Corticosteroids (4)<br>Tocilizumab (5)                           | 1/4   |
| Müller et al (71)<br>Austria         | 1  | 55  | 100% liver                                                             | Letter to the editor | Hospitalized (1)<br>ICU (0)   | None                                                                                                             | 0/1   |
| Myers et al (72)<br>United States    | 8  | 59  | 100% lung                                                              | Case report          | Hospitalized (7)<br>ICU (3)   | Antiviral (2)<br>Corticosteroids (6)<br>IVIg (4)<br>Cytokine Blockade (3)                                        | 2/6   |
| Nair et al (73)<br>United States     | 10 | 57  | 100% kidney                                                            | Retrospective cohort | Hospitalized (9)<br>ICU (5)   | HCQ (9)<br>Azithromycin (9)<br>Corticosteroids (3)                                                               | 3/7   |
| Ning et al (74)<br>China             | 1  | 29  | 100% liver                                                             | Case report          | Hospitalized (1)<br>ICU (0)   | Antiviral (1)                                                                                                    | 0/1   |
| Patrono et al (75)<br>Italy          | 10 | 64  | 100% liver                                                             | Short communication  | Hospitalized (9)<br>ICU (NI)  | Antiviral (2)<br>HCQ (6)<br>Corticosteroids (3)                                                                  | 1/9   |
| Pereira et al (76)<br>United States  | 90 | 57  | 14% liver,<br>51% kidney,<br>10% heart,<br>19% lung, 5% multiple organ | Case series          | Hospitalized (68)<br>ICU (23) | Antiviral (2)<br>HCQ (62)<br>Azithromycin (45)<br>Corticosteroid (16)<br>Tocilizumab (14)                        | 16/74 |
| Pérez-Sáez et al (77)<br>Spain       | 80 | NA  | 100% kidney                                                            | Brief communication  | Hospitalized (80)<br>ICU (24) | HCQ (79)<br>Azithromycin (59)<br>Corticosteroids (64)<br>IVIg (12)<br>Cytokine blockade (22)<br>IFN $\alpha$ (5) | 26/54 |

|                                     |    |      |                                                                                                      |                      |                              |                                                                                                  |      |
|-------------------------------------|----|------|------------------------------------------------------------------------------------------------------|----------------------|------------------------------|--------------------------------------------------------------------------------------------------|------|
| Qin et al (78)<br>China             | 1  | 37   | 100% liver                                                                                           | Case report          | Hospitalized (1)<br>ICU (NI) | Antiviral (1)<br>IVIG (1)                                                                        | 0/1  |
| Russell et al (79)<br>United States | 1  | 3    | 100% heart                                                                                           | Case report          | Hospitalized (1)<br>ICU (0)  | IVIG (1)                                                                                         | 0/1  |
| Seminari et al (80)<br>Italy        | 1  | 50   | 100% kidney                                                                                          | Case report          | Hospitalized (1)<br>ICU (0)  | None                                                                                             | 0/1  |
| Silva et al (81)<br>Portugal        | 5  | 56   | 80% kidney,<br>20% multiple                                                                          | Case series          | Hospitalized (4)<br>ICU (1)  | HCQ (3)<br>Corticosteroids (5)                                                                   | 1/4  |
| Thammathiwat et al (82)<br>Thailand | 1  | 58   | 100% kidney                                                                                          | Case report          | Hospitalized (1)<br>ICU (NI) | Antiviral 1<br>HCQ (1)<br>Azithromycin (1)<br>Corticosteroids (1)<br>IVIG (1)<br>Tocilizumab (1) | 0/1  |
| Travi et al (83)<br>Italy           | 13 | 59   | 53.8% liver,<br>30.8% kidney,<br>15.4%<br>multiple                                                   | Case series          | NA                           | Antiviral (4)<br>HCQ (11)<br>Corticosteroids (4)<br>Tocilizumab (2)                              | 1/12 |
| Tschopp et al (84)<br>Switzerland   | 21 | 56   | 23.8% liver,<br>47.6% kidney,<br>4.8% heart,<br>lung 4.8%,<br>4.8%<br>pancreas,<br>14.3%<br>multiple | Retrospective cohort | Hospitalized (5)<br>ICU (5)  | Antiviral (14)<br>Immune modulation (4)                                                          | 2/19 |
| Verleden et al (85)<br>Belgium      | 10 | 60.5 | 100% lung                                                                                            | Retrospective cohort | Hospitalized (8)<br>ICU (1)  | HCQ (9)<br>Azithromycin (9)<br>Tocilizumab (1)                                                   | 1/9  |
| Wang et al (86)<br>China            | 1  | 49   | 100% kidney                                                                                          | Case report          | Hospitalized (1)<br>ICU (0)  | Antiviral (1)<br>Corticosteroids (1)<br>IFN $\alpha$ (1)                                         | 0/1  |
| Webb et al (87)<br>United Kingdom   | 39 | NA   | 100% liver                                                                                           | Case series          | NI                           | NI                                                                                               | 9/30 |

|                                                  |    |      |                                                        |                         |                               |                                                                                                                              |      |
|--------------------------------------------------|----|------|--------------------------------------------------------|-------------------------|-------------------------------|------------------------------------------------------------------------------------------------------------------------------|------|
| Yi et al (88)<br>United States                   | 21 | 54.8 | 14% liver,<br>57% kidney,<br>10% lung,<br>20% multiple | Case series             | Hospitalized (14)<br>ICU (7)  | Antiviral (2)<br>HCQ (9)<br>Azithromycin (9)<br>Corticosteroid (3)<br>Convalescent<br>plasma (1)<br>Cytokine Blockade<br>(6) | 1/20 |
| Zhong et al (89)<br>China                        | 2  | 42.5 | 50% liver,<br>50% kidney                               | Case report             | Hospitalized (2)<br>ICU (1)   | Antiviral (3)<br>Corticosteroids (1)<br>IVIG (1)<br>IFN-a (1)                                                                | 0/2  |
| Zhu et al (90)<br>China                          | 10 | 49.5 | 100% kidney                                            | Retrospective<br>cohort | Hospitalized (10)<br>ICU (NI) | Antiviral (9)<br>Corticosteroids (8)<br>IVIG (7)                                                                             | 1/9  |
| <b>HCT</b>                                       |    |      |                                                        |                         |                               |                                                                                                                              |      |
| Foss et al (91)<br>United States                 | 1  | 47   | 100%<br>allogeneic                                     | Case report             | Hospitalized (1)<br>ICU (0)   | HCQ (1)<br>Ruxolitinib (1)                                                                                                   | 0/1  |
| Huang J et al<br>(92)<br>China                   | 1  | 51   | 100%<br>allogeneic                                     | Case report             | Hospitalized (1)<br>ICU (1)   | Antiviral (1)<br>Corticosteroid (1)<br>IVIG (1)                                                                              | 1/0  |
| Innes et al (93)<br>United<br>Kingdom            | 1  | 53   | 100%<br>allogeneic                                     | Case report             | Hospitalized (1)<br>ICU (1)   | Tocilizumab (1)<br>Ruxolitinib (1)                                                                                           | 0/1  |
| Kanellopoulos<br>et al (94)<br>United<br>Kingdom | 7  | 64   | 86%<br>allogeneic<br>14%<br>autologous                 | Case series             | NI                            | HCQ (1)                                                                                                                      | 2/5  |
| Karataş et al<br>(95)<br>Turkey                  | 1  | 61   | 100%<br>autologous                                     | Case report             | Hospitalized (1)<br>ICU (0)   | HCQ (1)<br>Azithromycin (1)<br>Convalescent<br>plasma (1)                                                                    | 0/1  |
| Lupo-<br>Stanghellini et<br>al (96)<br>Italy     | 5  | NI   | NI                                                     | Case report             | NI                            | NI                                                                                                                           | NI   |
| Malard et al<br>(97)<br>France                   | 7  | 61   | 29%<br>allogeneic<br>71%<br>autologous                 | Retrospective<br>cohort | NI                            | Antiviral (1)<br>HCQ (1)<br>Cytokine Blockade<br>(2)                                                                         | 1/6  |

|                                                     |     |      |                                               |                                        |                                   |                                                                          |       |
|-----------------------------------------------------|-----|------|-----------------------------------------------|----------------------------------------|-----------------------------------|--------------------------------------------------------------------------|-------|
| Nazon et al (98)<br>France                          | 1   | 17   | 100%<br>allogeneic                            | Case report                            | Hospitalized (0)<br>ICU (0)       | None                                                                     | 0/1   |
| Niu et al (99)<br>United States                     | 2   | 60   | 100%<br>allogeneic                            | Case report                            | Hospitalized (2)<br>ICU (1)       | IVIG (2)<br>Convalescent<br>plasma (1)                                   | 1/1   |
| Saraceni et al<br>(100)<br>Italy                    | 1   | 59   | 100%<br>allogeneic                            | Case report                            | Hospitalized (1)<br>ICU (1)       | Antiviral (1)<br>HCQ (1)                                                 | 0/1   |
| Vicent et al<br>(101)<br>Spain                      | 8   | 10.5 | 100%<br>allogeneic                            | Case series                            | Hospitalized (5)<br>ICU (2)       | Antiviral (3)<br>HCQ (6)<br>Azithromycin (2)<br>Cytokine Blockade<br>(3) | 1/7   |
| <b>Adult Cancer</b>                                 |     |      |                                               |                                        |                                   |                                                                          |       |
| Al-Shamsi et al<br>(102)<br>United Arab<br>Emirates | 7   | 52   | 100% solid<br>tumor                           | Prospective<br>observational<br>cohort | Hospitalized (2)<br>ICU (2)       | NI                                                                       | 1/6   |
| Aries et al (103)<br>United<br>Kingdom              | 35  | 69   | 100% heme<br>malignancy                       | Retrospective<br>cohort                | NI                                | NI                                                                       | 14/21 |
| Assad et al<br>(104)<br>France                      | 55  | 58   | 36% heme<br>malignancy,<br>64% solid<br>tumor | Retrospective<br>cohort                | NI                                | Antiviral (18)                                                           | 8/47  |
| Chaidos (105)<br>United<br>Kingdom                  | 2   | 63   | 100% heme<br>malignancy                       | Case report                            | Hospitalized (2)<br>ICU (1)       | Tocilizumab (2)                                                          | 0/2   |
| Dai et al (106)<br>China                            | 105 | 64   | 9% heme<br>malignancy,<br>91% solid<br>tumor  | Retrospective<br>cohort                | Hospitalized<br>(105)<br>ICU (19) | Antiviral (75)<br>Corticosteroids<br>(19)                                | 16/89 |
| Dhakal et al<br>(107)<br>USA                        | 7   | 75   | 100% heme<br>malignancy                       | Case series                            | Hospitalized (5)<br>ICU (4)       | HCQ (1)<br>Azithromycin (1)                                              | 4/3   |
| Gonzalez-Lugo<br>et al (108)<br>USA                 | 7   | 76   | 100% heme<br>malignancy                       | Case series                            | Hospitalized (5)<br>ICU (0)       | Antiviral (1)<br>HCQ (1)                                                 | 1/6   |

|                                   |     |    |                                      |                                  |                                |                                                                                            |         |
|-----------------------------------|-----|----|--------------------------------------|----------------------------------|--------------------------------|--------------------------------------------------------------------------------------------|---------|
| Kuderer et al (109)<br>USA        | 928 | 66 | 22% heme malignancy, 78% solid tumor | Retrospective cohort             | Hospitalized (NI)<br>ICU (130) | HCQ (278)<br>Azithromycin (278)                                                            | 121/807 |
| Lee et al (110)<br>United Kingdom | 800 | 69 | 14% heme malignancy, 86% solid tumor | Prospective observational cohort | Hospitalized (704)<br>ICU (56) | NI                                                                                         | 224/576 |
| Li et al (111)<br>China           | 5   | 47 | 100% heme malignancy                 | Case series                      | NI                             | NI                                                                                         | 1/4     |
| Liang et al (112)<br>China        | 18  | 60 | 100% solid tumor                     | Prospective cohort               | Hospitalized (NI)<br>ICU (9)   | NI                                                                                         | NI      |
| Martin-Moro et al (113)<br>Spain  | 34  | 73 | 100% heme malignancy                 | Retrospective cohort             | Hospitalized (34)<br>ICU (2)   | Antiviral (18)<br>HCQ (29)<br>Azithromycin (15)<br>Corticosteroids (19)<br>Tocilizumab (9) | 11/23   |
| Mehta et al (114)<br>USA          | 218 | 69 | 25% heme malignancy, 75% solid tumor | Retrospective cohort             | Hospitalized (NI)<br>ICU (23)  | NI                                                                                         | 61/158  |
| Miyashita et al (115)<br>USA      | 334 | NI | 100% solid tumor                     | Retrospective cohort             | NI                             | NI                                                                                         | 37/297  |
| Omarini et al (116)<br>Italy      | 9   | 73 | 33% heme malignancy, 67% solid tumor | Case series                      | Hospitalized (6)<br>ICU (2)    | NI                                                                                         | 2/7     |
| Ouyang et al (117)<br>China       | 1   | 56 | 100% heme malignancy                 | Case report                      | NI                             | NI                                                                                         | 0/1     |

|                                   |     |    |                                         |                      |                                |                                                                            |        |
|-----------------------------------|-----|----|-----------------------------------------|----------------------|--------------------------------|----------------------------------------------------------------------------|--------|
| Robilotti et al (118)<br>USA      | 423 | NI | 24% heme malignancy,<br>76% solid tumor | Retrospective cohort | Hospitalized (168)<br>ICU (48) | NI                                                                         | 39/384 |
| Thibaud et al (119)<br>USA        | 8   | 72 | 100% heme malignancy                    | Case series          | Hospitalized (8)<br>ICU (NI)   | HCQ (7)<br>Azithromycin (4)<br>Tocilizumab (1)                             | 2/6    |
| Tian et al (120)<br>China         | 232 | 64 | 100% solid tumor                        | Retrospective cohort | NI                             | Antiviral (183)<br>Immunomodulator (86)                                    | 46/186 |
| Yang F et al (121)<br>China       | 52  | 63 | 100% solid tumor                        | Case control         | Severe/Critical (37)           | NI                                                                         | 11/41  |
| Yang K et al (122)<br>China       | 205 | 63 | 11% heme malignancy,<br>89% solid tumor | Retrospective cohort | Hospitalized (123)<br>ICU (30) | Antiviral (193)<br>Corticosteroids (62)<br>IVIG (59)                       | 40/165 |
| Yu et al (123)<br>China           | 12  | 66 | 100% solid tumor                        | Retrospective cohort | Hospitalized (12)<br>ICU (1)   | NI                                                                         | 3/9    |
| Zhang H et al (124)<br>China      | 1   | 57 | 100% solid tumor                        | Case report          | Hospitalized (1)               | Antiviral (1)                                                              | 0/1    |
| Zhang L et al (125)<br>China      | 28  | 65 | 100% solid tumor                        | Retrospective cohort | Hospitalized (28)<br>ICU (10)  | Antivirals (71)<br>Corticosteroids (54)<br>IVIG (36)                       | 8/20   |
| Zhang X et al (126)<br>China      | 1   | 60 | 100% heme malignancy                    | Case report          | Hospitalized (1)               | Corticosteroids (1)<br>Tocilizumab (1)                                     | 0/1    |
| <b>Pediatric Cancer</b>           |     |    |                                         |                      |                                |                                                                            |        |
| St. Jude Registry (127)<br>Global | 623 | NI | 67% heme malignancy,<br>33% solid tumor | Database             | Hospitalized (192)<br>ICU (38) | Antiviral (37)<br>HCQ (28)<br>Azithromycin (53)<br>Convalescent plasma (2) | 21/602 |

| <b>General Population</b>         |           |      |                                                                    |               |                                     |                              |            |
|-----------------------------------|-----------|------|--------------------------------------------------------------------|---------------|-------------------------------------|------------------------------|------------|
| Pormohammad et al (128)<br>Global | 6174<br>2 | 48** | General population, inclusive of 2.7% cancer patients              | Meta-analysis | Hospitalized (50011)<br>ICU (15806) | NI                           | 3705/58037 |
| Fried et al (130)<br>USA          | 1172<br>1 | NI   | General population hospitalized with COVID-19 in the United States | Meta-analysis | Hospitalized (11721)<br>ICU (2336)  | Antiviral (48)<br>HCQ (4232) | 2514       |
| Tzotzos et al (131)<br>Global     | 2486      | NI   | General population hospitalized with COVID-19                      | Meta-analysis | Hospitalized (1658)<br>ICU (429)    | NI                           | 347        |
