# Supplementary material
Source: PubMed Central journal article supplement (PMC7859698)
Supplement: mmc9.pdf [file mmc9.pdf]

|                          | SOT                  | HCT                  | A-CA                 |
|--------------------------|----------------------|----------------------|----------------------|
| <b>Symptoms</b>          |                      |                      |                      |
| Fever                    | 56.3% [37.2%; 69.6%] | 0.0% [0.0%; 58.5%]   | 88.1% [82.3%; 92.0%] |
| Fatigue                  | 71.1% [54.5%; 81.6%] | 0.0% [0.0%; 0.0%]    | 91.9% [86.3%; 95.1%] |
| Myalgia                  | 76.3% [65.2%; 83.8%] | 0.0% [0.0%; 0.0%]    | 55.1% [0.0%; 82.0%]  |
| Cough                    | 28.2% [0.0%; 53.3%]  | 0.0% [0.0%; 88.4%]   | 90.2% [85.7%; 93.3%] |
| Dyspnea                  | 77.0% [68.3%; 83.3%] | 77.7% [27.9%; 93.1%] | 85.4% [77.4%; 90.5%] |
| Vomiting                 | 71.6% [56.8%; 81.3%] | 0.0% [0.0%; 0.0%]    | 0.0% [0.0%; 77.9%]   |
| Neurologic               | 43.4% [6.2%; 65.8%]  | 0.0% [0.0%; 0.0%]    | 32.4% [0.0%; 71.3%]  |
| <b>Comorbidities</b>     |                      |                      |                      |
| Hypertension             | 80.5% [66.0%; 88.8%] | 83.8% [78.4%; 87.8%] | 54.3% [0.0%; 86.9%]  |
| Diabetes                 | 94.8% [92.6%; 96.3%] | 67.9% [54.9%; 77.2%] | 0.0% [0.0%; 70.6%]   |
| Pulmonary Disease        | 93.2% [89.4%; 95.6%] | 65.3% [47.9%; 76.9%] | 32.3% [0.0%; 93.0%]  |
| Cardiovascular Disease   | 86.0% [76.8%; 91.6%] | 69.6% [56.1%; 78.9%] | 48.7% [0.0%; 85.1%]  |
| <b>COVID-19 Severity</b> |                      |                      |                      |
| Mild/Moderate            | 76.3% [66.6%; 83.2%] | 0.0% [0.0%; 37.9%]   | 97.2% [96.1%; 98.0%] |
| Severe                   | 76.3% [66.6%; 83.2%] | 0.0% [0.0%; 37.9%]   | 97.2% [96.1%; 98.0%] |
| <b>Hospital Outcome</b>  |                      |                      |                      |
| Intensive Care           | 70.7% [57.6%; 79.7%] | 0.0% [0.0%; 69.0%]   | 97.9% [96.8%; 98.6%] |
| Mortality                | 36.0% [0.2%; 59.0%]  | 0.0% [0.0%; 37.4%]   | 92.4% [86.3%; 95.8%] |
| <b>Therapy Change</b>    |                      |                      |                      |
| Antimetabolite           | 66.7% [51.2%; 77.3%] | N/A                  | N/A                  |
| Calcineurin Inhibitor    | 92.5% [90.4%; 94.1%] | N/A                  | N/A                  |
| mTOR Inhibitor           | 71.5% [27.9%; 88.7%] | N/A                  | N/A                  |
| Antineoplastic Therapy   | N/A                  | N/A                  | 91.0% [80.0%; 95.9%] |
