# Supplementary material
Source: PubMed Central journal article supplement (PMC7859698)

**A**

normal

**C Reactive Protein**

Study (n of patients)

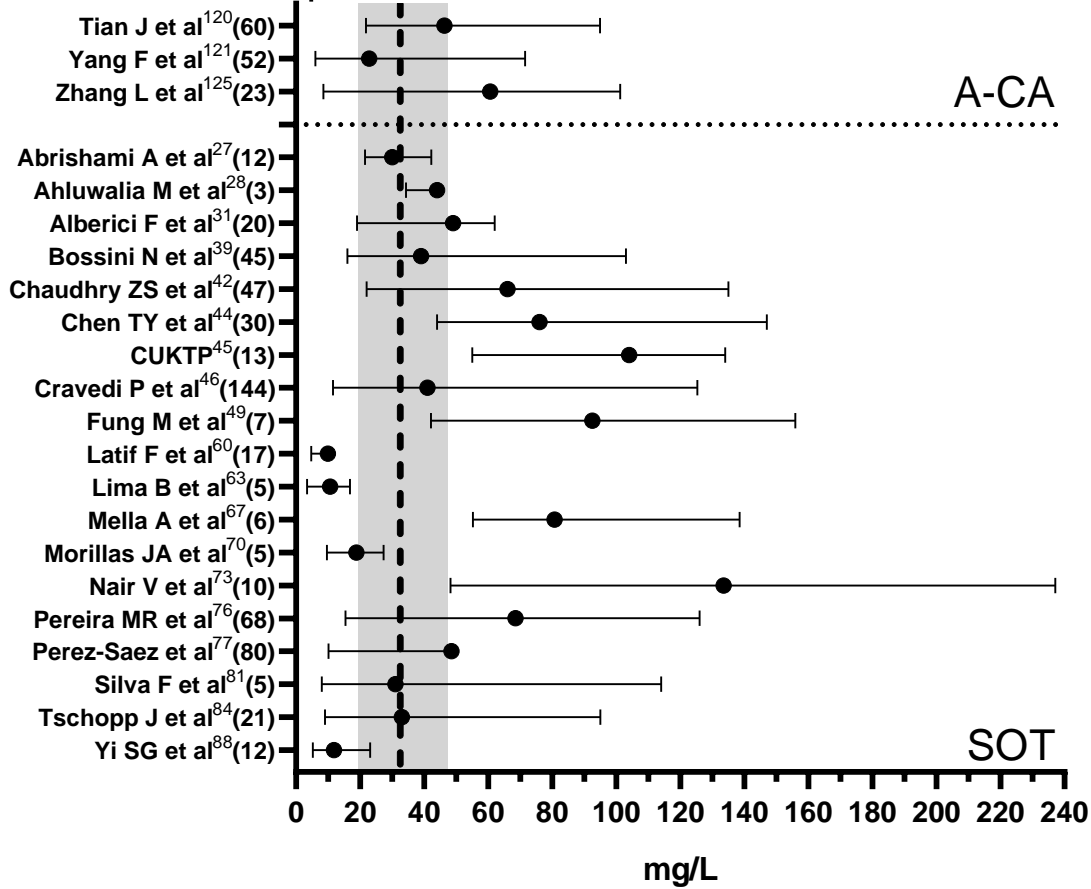

A-CA

SOT

mg/L

Supplement: mmc1.pdf [file mmc1.pdf]

**C****Lactate Dehydrogenase**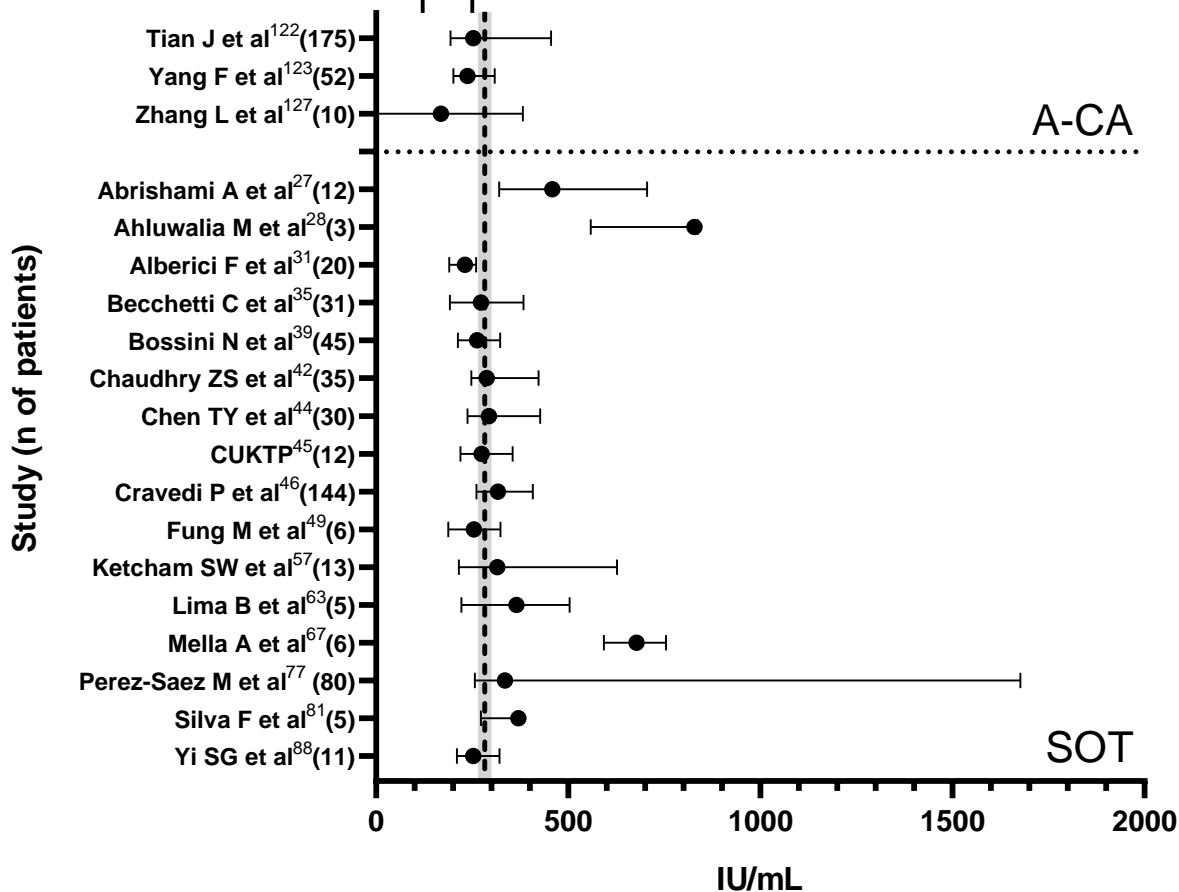

Supplement: mmc3.pdf [file mmc3.pdf]

**D**

normal

**D Dimer**

Study (n of patients)

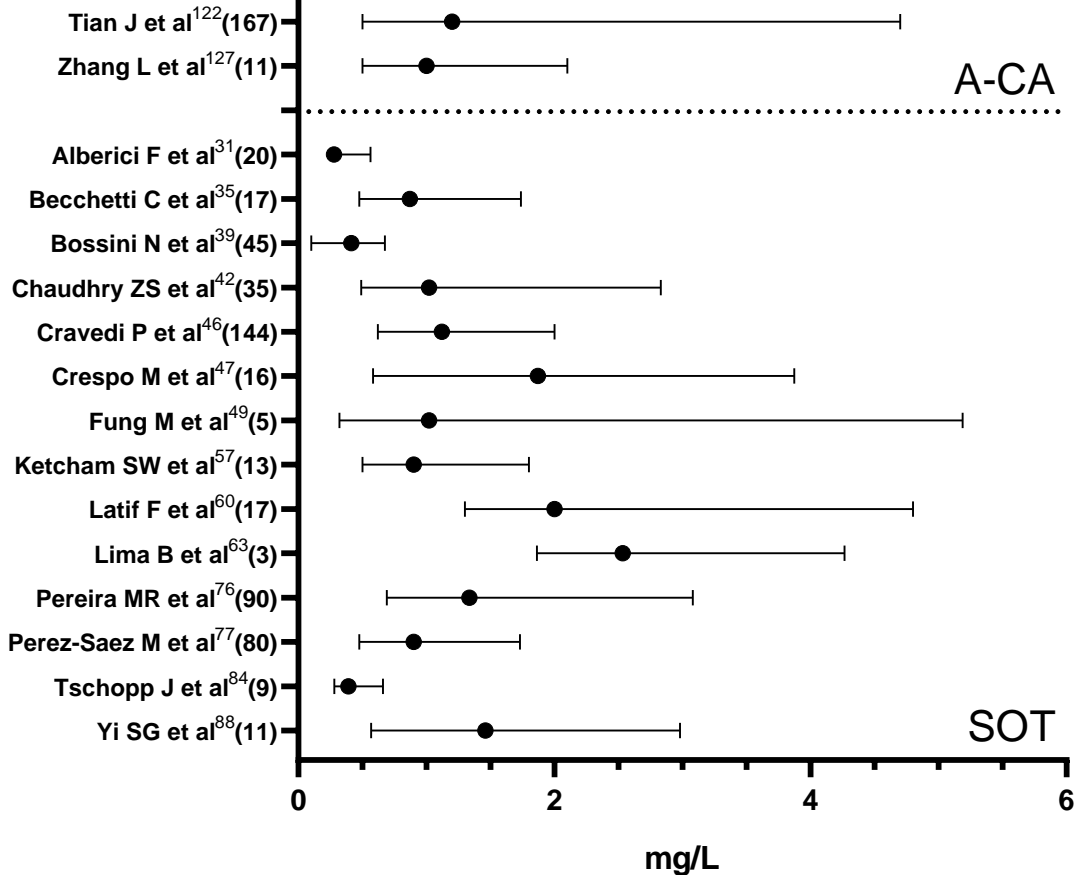

Supplement: mmc4.pdf [file mmc4.pdf]

**E**

normal

**IL-6**

Study (n of patients)

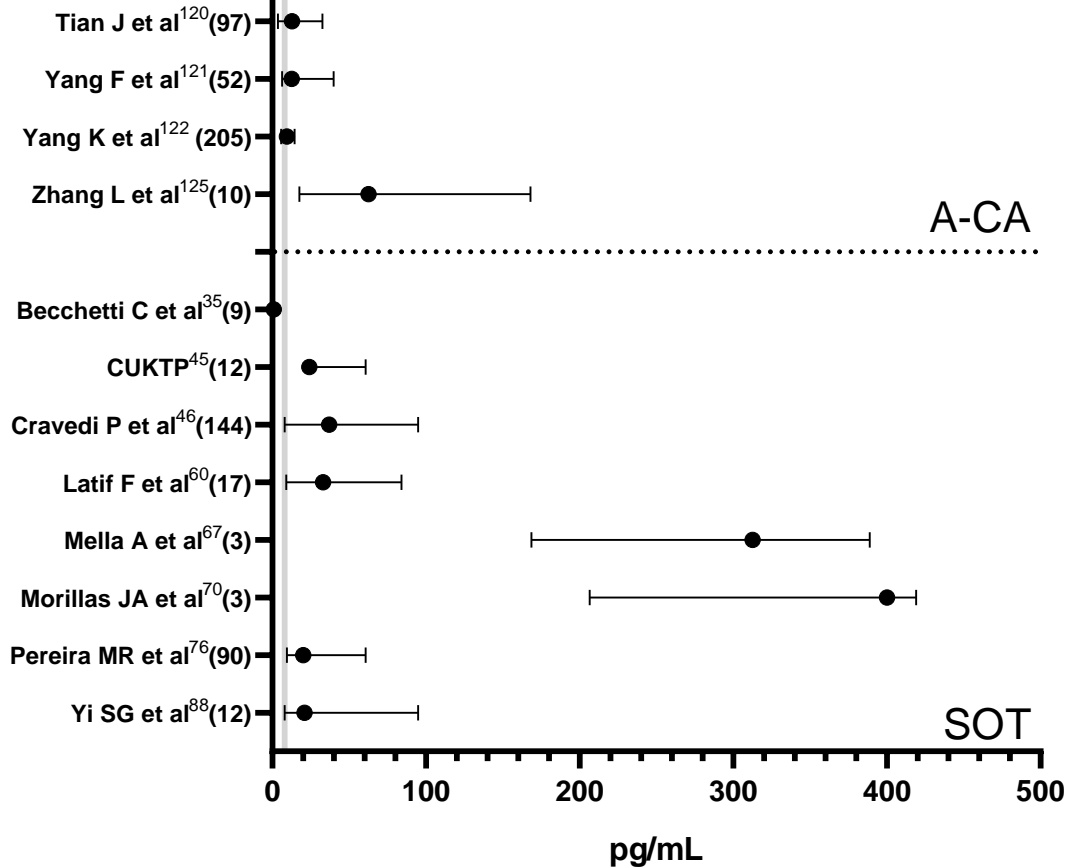

Supplement: mmc5.pdf [file mmc5.pdf]

## Solid Organ Transplant

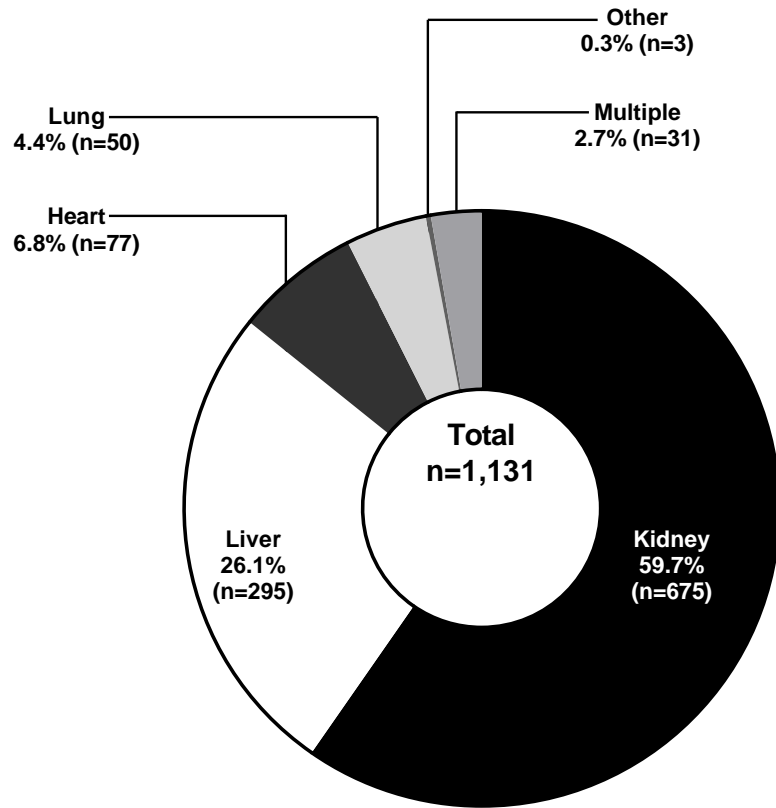

## Hematopoietic Cell Transplant

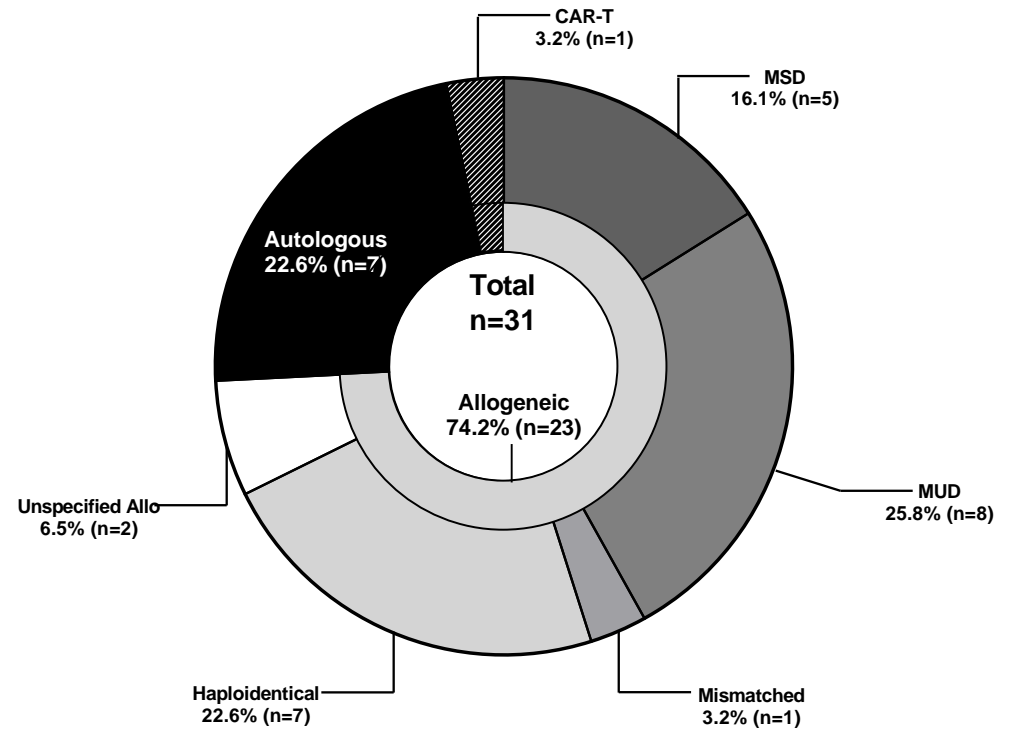

## Adult Cancer

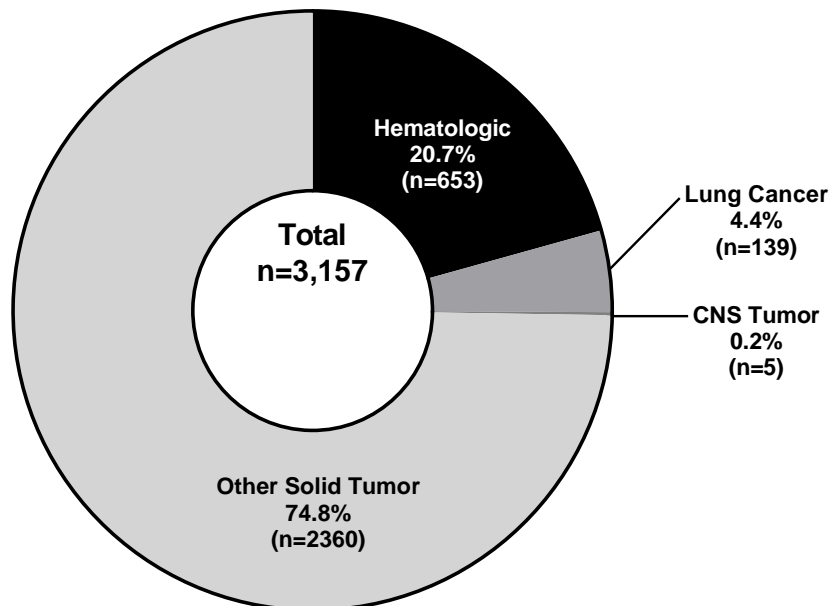

## Pediatric Cancer

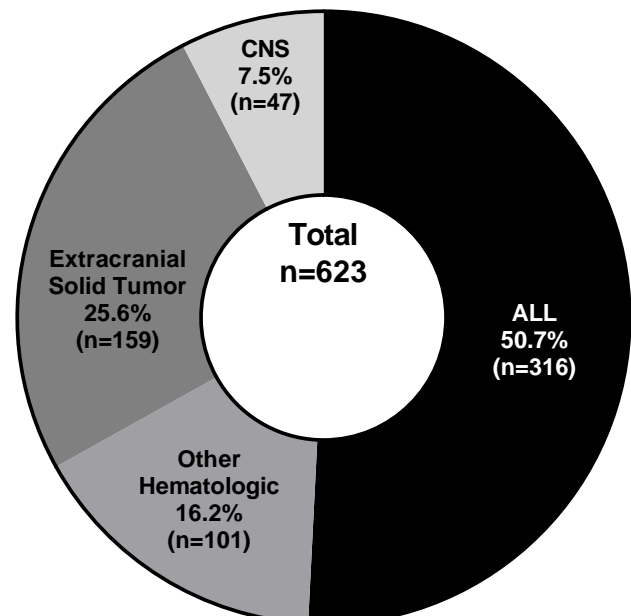

Supplement: mmc6.pdf [file mmc6.pdf]

# Treatment Modifications Caused by COVID-19

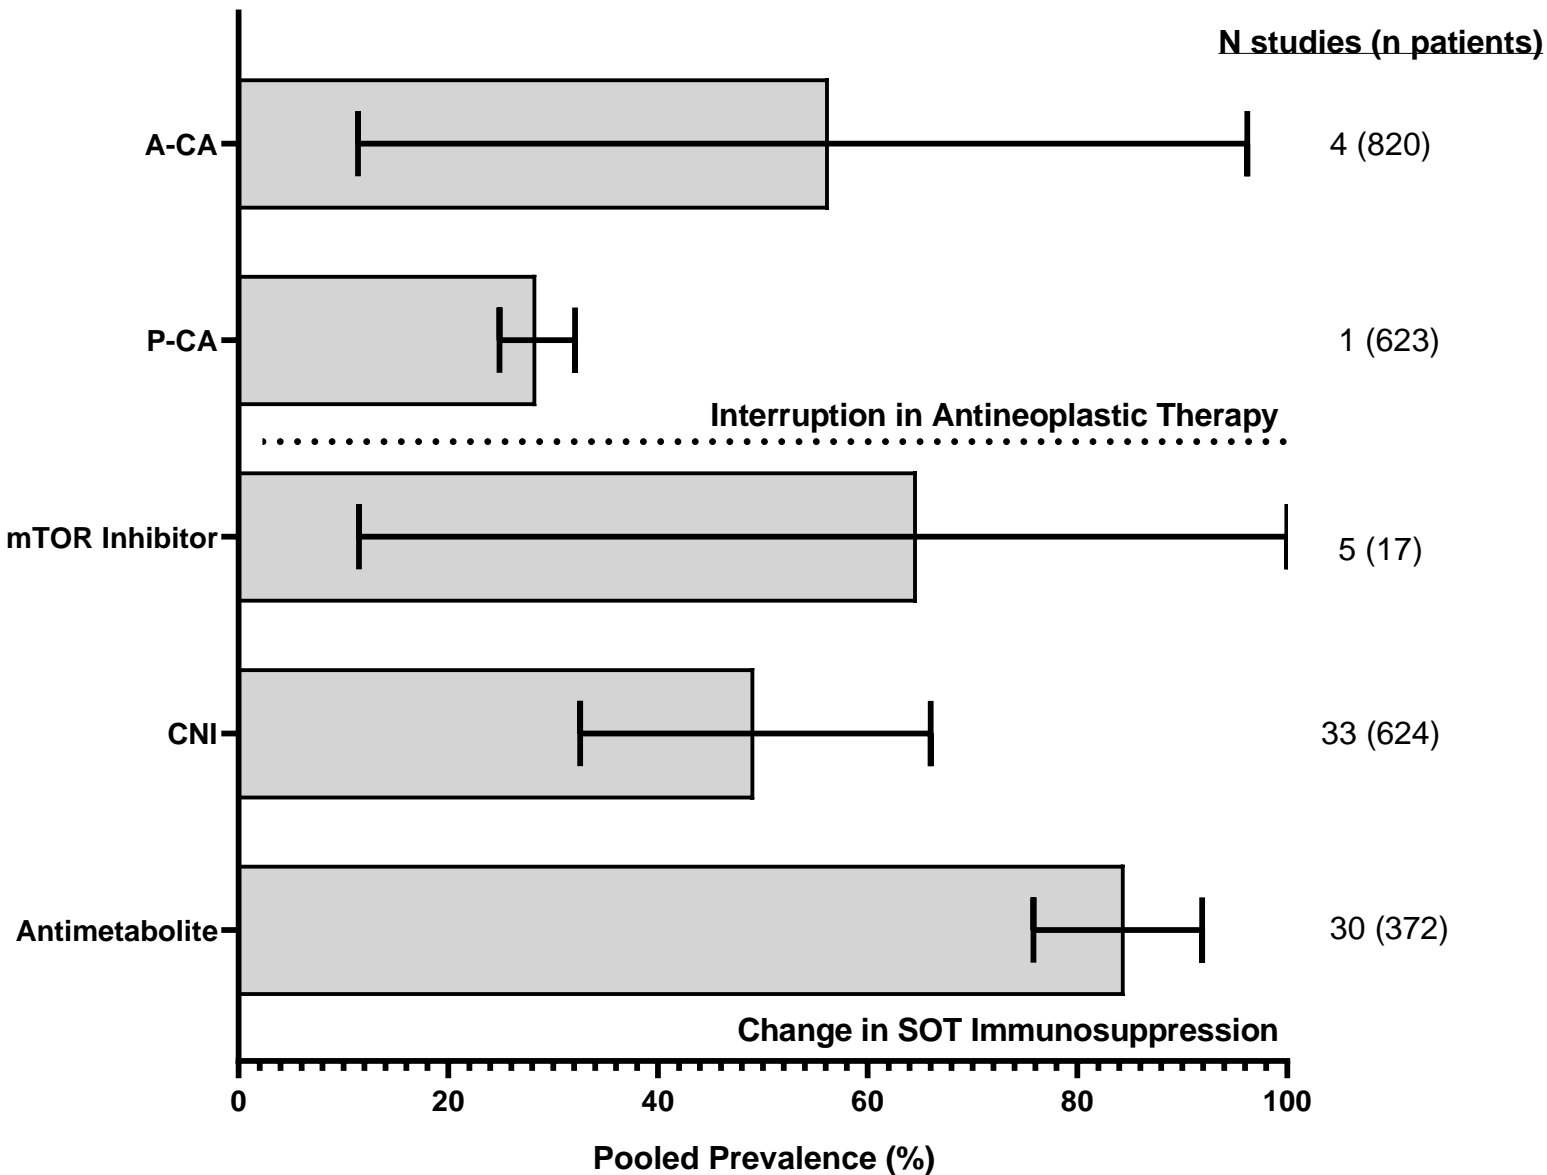

Supplement: mmc7.pdf [file mmc7.pdf]
